# Supplementary material for: Direct-acting antiviral resistance of Hepatitis C virus is promoted by epistasis
Source: PubMed Central journal article supplement (PMC10656532; doi:10.1038/s41467-023-42550-6), 2023-11-17
Supplement: 41467_2023_42550_MOESM4_ESM.pdf [file 41467_2023_42550_MOESM4_ESM.pdf]

## **Description of additional supplementary files**

**Supplementary Data 1:** Infectivity measurements for NS3 that were used for correlating with predictions from the fitness landscape model.

**Supplementary Data 2:** Accession numbers of NS3 sequences used for inferring the model.

**Supplementary Data 3:** The mean escape time predicted by the in-host evolutionary model for each residue with DRMs
